# Supplementary material
Source: Springer Nature journal article supplement (https://www.springermedizin.de/resource/supplementary/13063_2013_1926_MOESM1_ESM.pdf/9621604)
Supplement: MOESM1 [file 9621604]

| Topics suggested as a priority by more than one CTU director in round one | Number of responders in round two | Importance of research topic |                       |                       |                            |                       |                       |                                  |                       |                       |
|---------------------------------------------------------------------------|-----------------------------------|------------------------------|-----------------------|-----------------------|----------------------------|-----------------------|-----------------------|----------------------------------|-----------------------|-----------------------|
|                                                                           |                                   | Not important                |                       |                       | Important but not critical |                       |                       | Critical                         |                       |                       |
|                                                                           |                                   | 1                            | 2                     | 3                     | 4                          | 5                     | 6                     | 7                                | 8                     | 9                     |
| Adaptive designs                                                          | 32                                | <input type="radio"/>        | <input type="radio"/> | <input type="radio"/> | <input type="radio"/>      | <input type="radio"/> | <input type="radio"/> | <input checked="" type="radio"/> | <input type="radio"/> | <input type="radio"/> |
|                                                                           |                                   | 0%                           | 0%                    | 0%                    | 3%                         | 28%                   | 31%                   | 19%                              | 16%                   | 3%                    |
